# Supplementary material for: Validation of a DNA methylation microarray for 850,000 CpG sites of the human genome enriched in enhancer sequences
Source: PubMed Central journal article supplement — Epigenomics. 2015 Dec 17;8(3):389–99. doi: 10.2217/epi.15.114 (PMC4864062; doi:10.2217/epi.15.114), 2015-12-17
Supplement: epi-08-389-s11.pdf [file epi-08-389-s11.pdf]

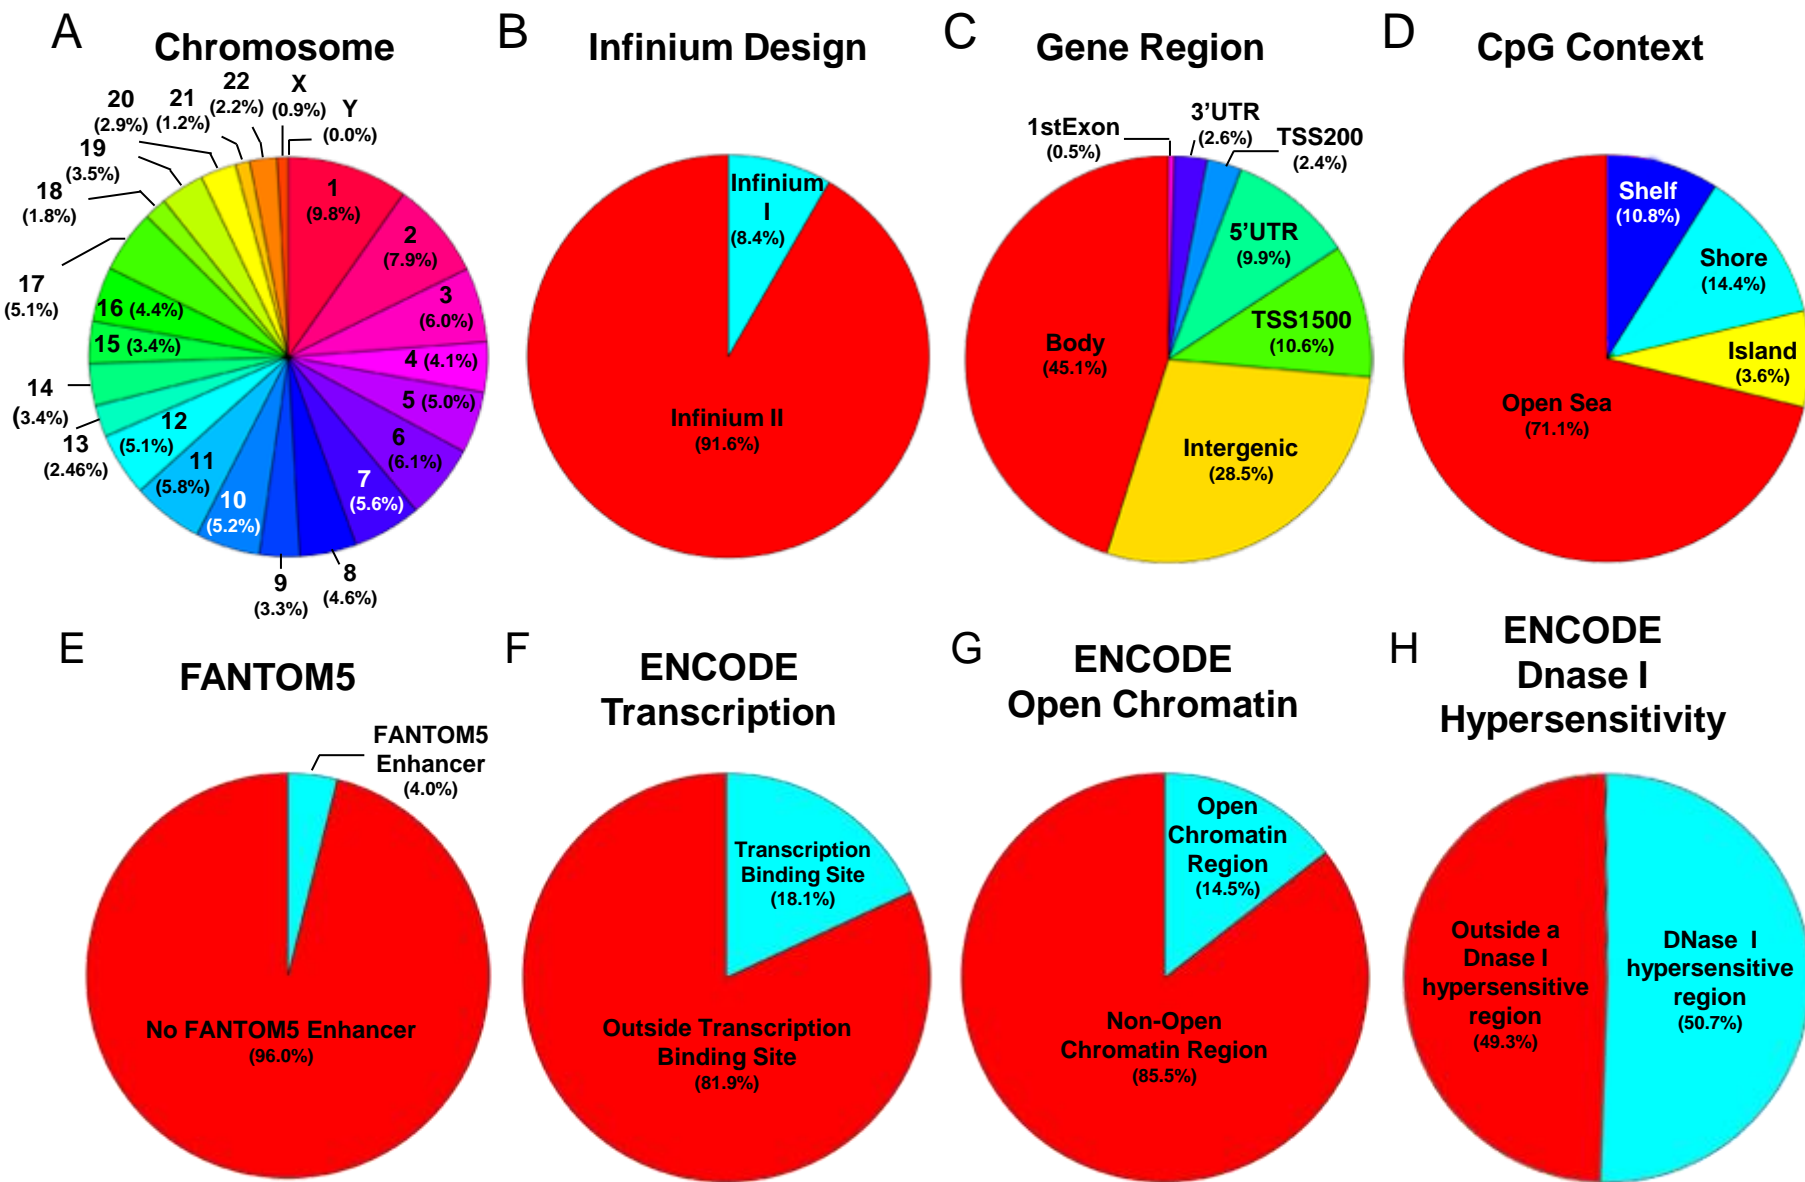

**Supplementary Figure 1.** Genomic and functional context of the 361,351 hydroxymethylated (oxBS-BS  $\geq 0.2$ ) CpG sites detected using the MethylationEPIC BeadChip microarray (850K) on sorted normal neurons (N229), based on chromosome location (A); Infinium design chemistry (Infinium I, II) (B); UCSC gene region feature category (TSS200, TSS1500, 5'UTR, 1stExon, Body, 3'UTR) (C); location of the CpG relative to the CpG island (Open Sea, Island, Shore, Shelf) (D); FANTOM5 associated enhancer regions (E); and ENCODE project annotation for transcription binding site (F), open chromatin (G) and Dnase I hypersensitive (H) regions.
